# Supplementary material
Source: PubMed Central journal article supplement (PMC2962461)

Sup. Fig 1

# Intestine Expression

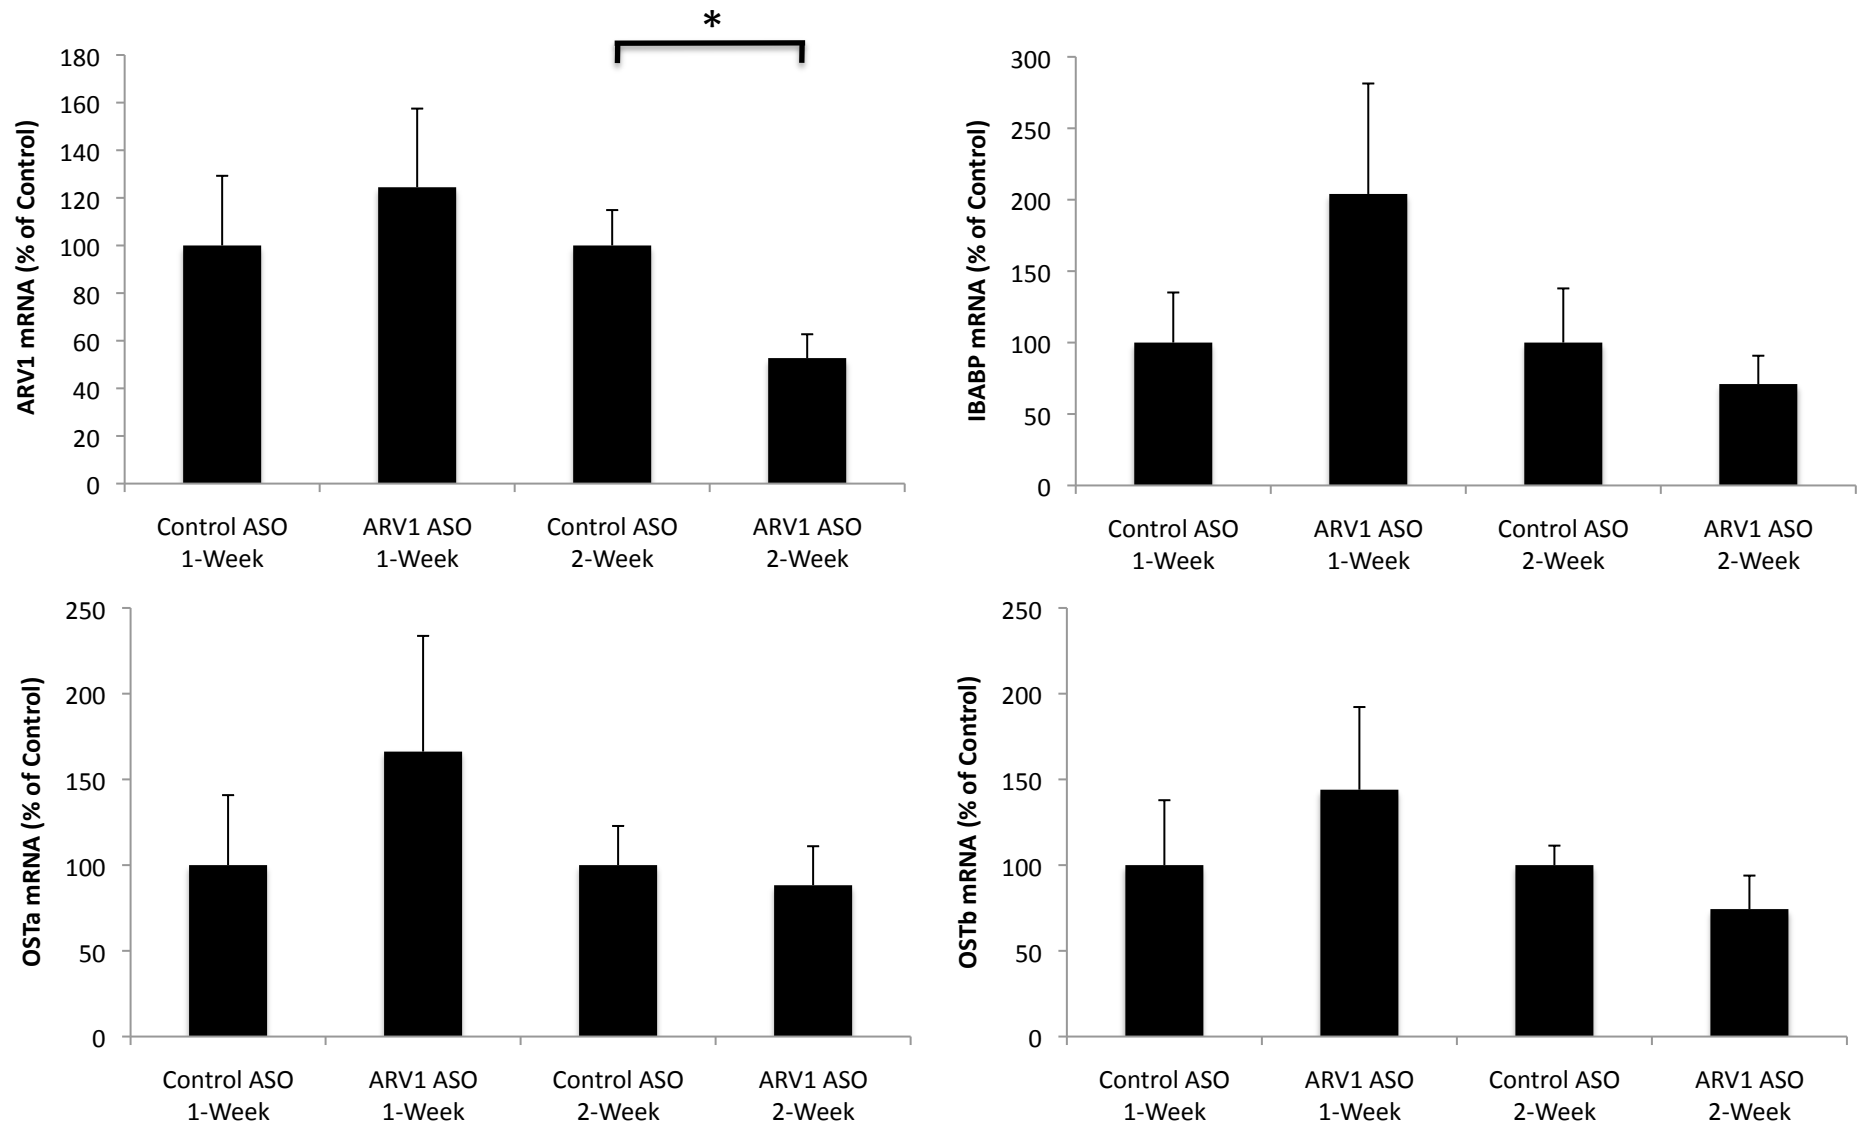

Supplement: supp_M110.165761_jbc.M110.165761-1.pdf [file supp_M110.165761_jbc.M110.165761-1.pdf]
